# Supplementary material
Source: Springer Nature journal article supplement (https://www.springermedizin.de/resource/supplementary/13058_2012_3178_MOESM1_ESM.PDF/9703438)

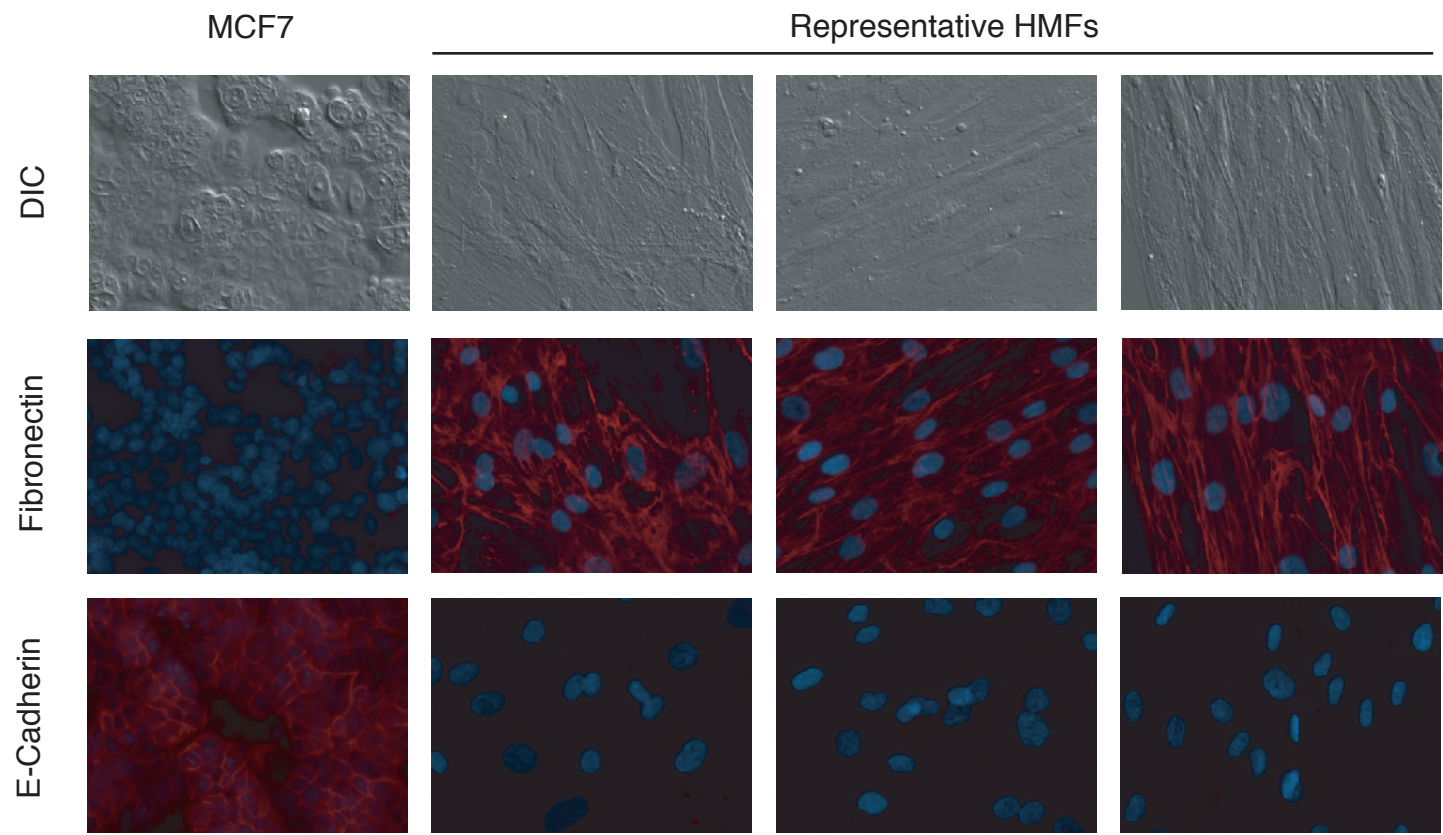

Supplement: MOESM1 [file 9703438]
